## Aging: Dial M for Mitochondria

Jae H. Hur<sup>1</sup>, Jaehyoung Cho<sup>1</sup>, and David W. Walker<sup>1,2</sup>

<sup>1</sup> *Department of Physiological Science, University of California, Los Angeles, Los Angeles, CA 90095, USA*

<sup>2</sup> *Molecular Biology Institute, University of California, Los Angeles, Los Angeles, CA 90095, USA*

**Running title:** Mitochondrial modulation of lifespan

**Key words:** *Drosophila*, longevity, *C. elegans*, respiratory chain

**Correspondence:** David W. Walker, PhD, Department of Physiological Science, University of California, Los Angeles, 621 Charles E. Young Dr. South, Los Angeles, CA 90095-1527, USA

**Received:** 01/14/10; **accepted:** 01/25/10; **published on line:** 01/26/10

**E-mail:** [davidwalker@ucla.edu](mailto:davidwalker@ucla.edu)

**Copyright:** © Hur et al. This is an open-access article distributed under the terms of the Creative Commons Attribution License, which permits unrestricted use, distribution, and reproduction in any medium, provided the original author and source are credited

**Abstract:** A major goal of aging research is to identify interventions that prolong lifespan in distantly related organisms. In recent years, genetic studies in both nematodes and rodents have reported that moderate inactivation of genes important for mitochondrial electron transport chain (ETC) function can promote longevity. We performed an RNAi screen to probe the role of ETC components in modulating lifespan in the fruit fly *Drosophila melanogaster*. In this Research Perspective, we discuss our findings and how they may relate to similar studies in worms and mice.

Aging is characterized by a general decline in physiological function that leads to morbidity and eventually, mortality. In recent years, significant progress has been made in our understanding of the nature of these changes at the molecular level. Due to the descriptive nature of these studies however, it has proven difficult to infer the relative importance of the many processes that contribute to aging. Alterations in mitochondrial energy metabolism may be particularly important because it is central to metabolism a vital process that affects every aspect of cellular function. Moreover, genetic studies in a number of model organisms have reported that inactivation of genes important for mitochondrial function can have profound effects on lifespan.

In this Perspective, we discuss our recent findings in the fruit fly *Drosophila* and how they relate to studies in other model organisms, including mammals.

### Age-related changes in mitochondrial function

Defects in mitochondrial electron transport chain (ETC)

function and their effects on aging and age-related disease have been widely reported [1,2]. Aged mammalian tissues show a decreased capacity to produce ATP and the impairment of mitochondrial function has been attributed to decreased rates of electron transfer by the selectively diminished activities of complexes I and IV [3]. In addition to decreased electron transfer and oxygen uptake, dysfunctional mitochondria in aged rodents are characterized by increased oxidation products of phospholipids, proteins and DNA, decreased membrane potential, and increased size and fragility [4]. These features of the aging process may be conserved across the animal kingdom. For example, in *Drosophila* aging is also associated with changes in mitochondrial structure [5,6] and a decline in mitochondrial function [7]. As in mammals, complex IV activity appears to be particularly vulnerable to both aging [7] and oxidative stress [6] in flies. These observations have led to the concept of the “vicious cycle” in which an initial ROS-induced impairment of mitochondria leads to increased oxidant production that, in turn, leads to further mitochondrial damage [8].

Another possible explanation behind the age-related decline in ETC function is the decline in expression of nuclear-encoded components of the ETC. In one study, the authors compared microarray data between two organisms (*Caenorhabditis elegans* and *Drosophila*) as they aged in an effort to obtain a consensus aging transcriptome. In both species, there was a significant decrease in a large set of genes involved in ATP synthesis and mitochondrial respiration [9]. Similar studies have identified age-related declines in the expression of genes involved in ETC function in both humans and mice [10,11]. At present, it is not known if these changes in gene expression are a cause, consequence or correlate of the aging process.

### **Inactivation of genes important for ETC function**

#### ***Caenorhabditis elegans***

The link between mitochondrial energy metabolism and longevity has been most extensively studied in the nematode *C. elegans*. Numerous studies have demonstrated that direct disruption of the mitochondrial electron transport chain (ETC) can produce large effects on lifespan. Although short-lived mutants are often considered less informative than long-lived mutants as they may result from novel pathologies unrelated to normal aging, the *mev-1* mutant may be a notable exception. This short-lived mutant carries a mutation in subunit C of mitochondrial complex II [12] and displays elevated ROS production [13] which has been proposed to be an important determinant of lifespan [8].

One of the first demonstrations that impaired ETC function could increase lifespan was the isolation and characterization of a long-lived mutant with a mutation in the iron sulfur protein (*isp-1*) of mitochondrial complex III [14]. The long-lived *clk-1* mutant lacks an enzyme required in the biosynthesis of ubiquinone, also known as coenzyme Q, an important electron acceptor for both complex I- and II-dependent respiration [15]. These results have been greatly expanded by a number of large-scale RNA-interference (RNAi) screens that have demonstrated that reducing the level of various components of respiratory chain complexes I, III, IV, or V results in longer-lived worms [16-20]. In addition, feeding worms a diet of respiratory deficient bacteria is also sufficient to extend lifespan [21,22].

When interpreting these findings, it may prove important to consider certain aspects of nematode ecology and physiology [23,24]. Worms make their living in the soil and, if given a choice, prefer hypoxic conditions [25], under which they can survive for remarkably long periods [26]. Physiologically, this may be enabled by an anaerobic energy-generating pathway,

not found in mammals, involving reverse electron transfer via fumarate reductase and malate dismutation [27]. It may prove telling that the phenotypic consequences of elevated mitochondrial oxidative stress differ in worms and other animals. Deletion of the mitochondrial superoxide dismutase 2 (*sod2*) results in very severe shortening of lifespan in both flies [28] and mice [29]. In contrast, *sod-2* deficiency in *C. elegans* has been reported to increase longevity in one study [30] and have negligible impact on longevity in another study [31]. Therefore, it is possible that the physiological and phenotypic consequences of ETC dysfunction may be different in worms compared to those in other animals. With this in mind, we thought it important to examine the impact of moderate inactivation of ETC genes in a different model organism.

#### ***Drosophila melanogaster***

The isolation and characterization of a *Drosophila* mutant with a defect in the iron-sulfur subunit (*sdhB*) of complex II was the first study to directly investigate the effects of decreased ETC function on fly longevity [32]. Interestingly, the biochemical and phenotypic consequences of complex II deficiency in flies are very similar to complex II (*mev-1*) deficiency in worms. Specifically, our biochemical data indicate that SDHB is critical in preventing electron leakage from complex II, so that mutant animals suffer from increased oxidative stress and, as a result, are highly sensitive to oxygen and die rapidly [32]. The fact that inactivation of complex II had similar phenotypic effects in flies and worms led us to question the consequences of moderate inactivation of other ETC genes in the fly.

By happy coincidence the generation of a genome-wide library of *Drosophila* RNAi transgenes [33] was reported shortly before one of us (D.W.W) moved to UCLA to start his independent research group. This technical advance allowed us to systematically inactivate a large fraction of nuclear encoded ETC genes in living flies and study their impact on longevity [34]. Not surprisingly, we observed that many of the RNAi lines produced larval lethality or shortened adult longevity. However, just like in the worm, we observed that RNAi-inactivation of certain ETC genes resulted in enhanced longevity [34]. A major conclusion of our study is that despite more than 600 million years of separate evolution, partial inactivation of certain ETC genes can promote longevity in both flies and worms. Furthermore, we observed that neuronal-specific RNAi mediated knock-down of certain ETC genes was sufficient to extend lifespan. The effects on longevity of tissue-specific ETC gene inactivations have not yet been reported in *C. elegans*.

Shortly after publication of the results of the RNAi screen, we reported that genetic and pharmacological treatments that target complex V affect lifespan in a nutrient-dependent manner [35]. In an independent study, similar observations were reported for complexes I and IV [36]. Together these findings strongly suggest that altered ETC activity plays a critical role in dietary restriction-mediated longevity in the fly.

### **Mammals**

In humans, mitochondrial defects have been implicated in a wide range of life-shortening degenerative diseases [2,37]. However, despite considerable progress in elucidating the underlying genetic defects, the molecular pathogenesis events linking the mutated gene to the observed clinical phenotype are poorly understood. Unfortunately, relatively few rodent models of ETC deficiency have been reported. The generation of a mouse lacking subunit D of complex II (SDHD) was reported as the first rodent model lacking a protein of the ETC [38]. Animals without an intact copy of *sdhD* die at early embryonic stages, while heterozygotes display complex II deficiency without alterations in body weight or major physiological dysfunction. More recently, it was reported that inactivation of the *Ndufs4* gene, which encodes an 18 kDa subunit of complex I, leads to an early-onset (5 weeks) encephalomyopathy [39].

There have also been a number of reports indicating that certain genetic manipulations that impair ETC function can protect against oxidative stress, neurodegeneration, obesity, and diabetes, and prolong longevity in mice. For example, tissue-specific deletion of apoptosis inducing factor (AIF) leads to reduced ETC function and was shown to protect mice against both diabetes and obesity [40,41]. Reduced activity of MCLK1, a mitochondrial enzyme necessary for ubiquinone biosynthesis, leads to a severe reduction of ETC function and a substantial increase in lifespan with no trade-off in growth or fertility [42,43]. Finally, mice carrying a disruption in SURF1, a putative complex IV assembly factor, display a complex IV biochemical defect, markedly prolonged longevity and complete protection from kainic acid-induced neurotoxicity [44]. It should be noted that these studies do not directly manipulate ETC gene activity. However, they clearly demonstrate that not all perturbations of ETC function in mammals are deleterious. A recent study that did directly manipulate an ETC gene supports the idea that under specific conditions, ETC inhibition can reduce oxidative stress and neurodegeneration in mammals. Targeted deletion of a complex IV subunit (COX10) in neurons was shown to decrease both oxidative stress

and amyloid plaque formation in a mouse model of Alzheimer's disease [45].

### **Electron transport chain activity and longevity: less is more?**

Taken together, the work in flies, mice and the large number of long-lived ETC mutant worms clearly demonstrates that decreased expression of certain ETC genes is an evolutionarily conserved mode of lifespan extension. However, the underlying mechanisms remain poorly understood. Our own work indicates that ETC gene manipulations that prolong lifespan are not necessarily associated with obvious energetic or physiological trade-offs. We identified five ETC gene hypomorphs associated with increased longevity. However, only two of the ETC gene knock-downs conferred detectable decreases in the abundance of fully assembled respiratory complexes. In addition, none of the five ETC gene perturbations resulted in a decrease in ATP levels. An important next step will be a careful and detailed analysis of different aspects of respiratory chain function in long-lived flies with reduced expression of ETC genes.

### **Summary/Conclusions**

Increased lifespan conferred by RNAi of mitochondrial respiratory components is not limited to nematodes but is also true for flies [34]. In addition, there is a growing body of data in mice, linking moderate respiratory chain dysfunction with enhanced longevity. Thus this mode of lifespan extension has the potential to be generally applicable to animals, as is the case for dietary restriction and altered insulin/IGF-1 signaling. There is, therefore, an urgent need for a better understanding of this 'Public' mechanism of aging.

A challenge that we find particularly pressing is to reconcile our results with the large number of studies that report an age-related decline in ETC gene expression and activity. If ETC activity decreases as a function of age, then it appears counterintuitive that RNAi knock-down of ETC genes would promote longevity. In contrast, we might speculate that strategies to increase respiratory chain function may prove effective in retarding the aging process. In yeast, manipulations that increase respiration are associated with increased longevity [46,47]. Critically, experimental manipulations that directly increase the activity of respiratory enzymes in metazoans have been lacking. And so, the consequences of increased respiratory chain activity in animals remain largely un-

explored. It is an exciting time to be studying the role of ETC activity in modulating animal aging.

## ACKNOWLEDGEMENTS

D.W.W received support from the UCLA Older Americans Independence Center, NIH/NIA Grant P30-AG028748, and the content does not necessarily represent the official views of the National Institute on Aging or the National Institutes of Health. D.W.W also received support from the Ellison Medical Foundation, the American Federation for Aging Research and the UCLA Center for gene environment in Parkinson's Disease. D.W.W is an Ellison Medical Foundation New Scholar in Aging.

## CONFLICT OF INTERESTS STATEMENT

The authors of this manuscript have no conflict of interest to declare.

## REFERENCES

1. Lin MT and Beal MF. Mitochondrial dysfunction and oxidative stress in neurodegenerative diseases. *Nature*. 2006; 443:787-795.
2. Wallace DC. A mitochondrial paradigm of metabolic and degenerative diseases, aging, and cancer: a dawn for evolutionary medicine. *Annu Rev Genet*. 2005; 39:359-407.
3. Navarro A and Boveris A. The mitochondrial energy transduction system and the aging process. *Am J Physiol Cell Physiol*. 2007; 292:C670-686.
4. Shigenaga MK, Hagen TM, and Ames BN. Oxidative damage and mitochondrial decay in aging. *Proc Natl Acad Sci U S A*. 1994; 91:10771-10778.
5. Burch GE, Sohal R, and Fairbanks LD. Ultrastructural changes in *Drosophila* heart with age. *Arch Pathol*. 1970; 89:128-136.
6. Walker DW and Benzer S. Mitochondrial "swirls" induced by oxygen stress and in the *Drosophila* mutant hyperswirl. *Proc Natl Acad Sci U S A*. 2004; 101:10290-10295.
7. Ferguson M, Mockett RJ, Shen Y, Orr WC, and Sohal RS. Age-associated decline in mitochondrial respiration and electron transport in *Drosophila melanogaster*. *Biochem J*. 2005; 390:501-511.
8. Balaban RS, Nemoto S, and Finkel T. Mitochondria, oxidants, and aging. *Cell*. 2005; 120:483-495.
9. McCarroll SA, Murphy CT, Zou S, Pletcher SD, Chin CS, Jan YN, Kenyon C, Bargmann CI, and Li H. Comparing genomic expression patterns across species identifies shared transcriptional profile in aging. *Nat Genet*. 2004; 36:197-204.
10. Fu C, Hickey M, Morrison M, McCarter R, and Han ES. Tissue specific and non-specific changes in gene expression by aging and by early stage CR. *Mech Ageing Dev*. 2006; 127:905-916.
11. Zahn JM, Sonu R, Vogel H, Crane E, Mazan-Mamczarz K, Rabkin R, Davis RW, Becker KG, Owen AB, and Kim S.K. Transcriptional profiling of aging in human muscle reveals a common aging signature. *PLoS Genet*. 2006; 2:e115.
12. Ishii N, Fujii M, Hartman PS, Tsuda M, Yasuda K, Senoo-Matsuda N, Yanase S, Ayusawa D, and Suzuki K. A mutation in succinate dehydrogenase cytochrome b causes oxidative stress and ageing in nematodes. *Nature*. 1998; 394:694-697.
13. Senoo-Matsuda N, Yasuda K, Tsuda M, Ohkubo T, Yoshimura S, Nakazawa H, Hartman PS, and Ishii N. A defect in the cytochrome b large subunit in complex II causes both superoxide anion overproduction and abnormal energy metabolism in *Caenorhabditis elegans*. *J Biol Chem*. 2001; 276:41553-41558.
14. Feng J, Bussiere F, and Hekimi S. Mitochondrial electron transport is a key determinant of life span in *Caenorhabditis elegans*. *Dev Cell*. 2001; 1:633-644.
15. Ewbank JJ, Barnes TM, Lakowski B, Lussier M, Bussey H, and Hekimi S. Structural and functional conservation of the *Caenorhabditis elegans* timing gene *clk-1*. *Science*. 1997; 275:980-983.
16. Curran SP and Ruvkun G. Lifespan regulation by evolutionarily conserved genes essential for viability. *PLoS Genet*. 2007; 3:e56.
17. Dillin A, Hsu AL, Arantes-Oliveira N, Lehrer-Graiwer J, Hsin H, Fraser AG, Kamath RS, Ahringer J, and Kenyon C. Rates of behavior and aging specified by mitochondrial function during development. *Science*. 2002; 298:2398-2401.
18. Lee SS, Lee RY, Fraser AG, Kamath RS, Ahringer J, and Ruvkun G. A systematic RNAi screen identifies a critical role for mitochondria in *C. elegans* longevity. *Nat Genet*. 2003; 33:40-48.
19. Hansen M, Hsu AL, Dillin A, and Kenyon C. New genes tied to endocrine, metabolic, and dietary regulation of lifespan from a *Caenorhabditis elegans* genomic RNAi screen. *PLoS Genet*. 2005; 1:119-128.
20. Chen D, Pan KZ, Palter JE, and Kapahi P. Longevity determined by developmental arrest genes in *Caenorhabditis elegans*. *Aging Cell*. 2007; 6:525-533.
21. Larsen PL and Clarke CF. Extension of life-span in *Caenorhabditis elegans* by a diet lacking coenzyme Q. *Science*. 2002; 295:120-123.
22. Saiki R, Lunceford AL, Bixler T, Dang P, Lee W, Furukawa S, Larsen PL, and Clarke CF. Altered bacterial metabolism, not coenzyme Q content, is responsible for the lifespan extension in *Caenorhabditis elegans* fed an *Escherichia coli* diet lacking coenzyme Q. *Aging Cell*. 2008; 7:291-304.
23. Melov S. Spotlight on nematode mitochondria in RNAi mega-screen. *Sci Aging Knowledge Environ* 2002; pe18.
24. Rea S and Johnson TE. A metabolic model for life span determination in *Caenorhabditis elegans*. *Dev Cell*. 2003; 5:197-203.
25. Gray JM, Karow DS, Lu H, Chang AJ, Chang JS, Ellis RE, Marletta MA, and Bargmann CI. Oxygen sensation and social feeding mediated by a *C. elegans* guanylate cyclase homologue. *Nature*. 2004; 430:317-322.
26. Scott BA, Avidan MS, and Crowder CM. Regulation of hypoxic death in *C. elegans* by the insulin/IGF receptor homolog DAF-2. *Science*. 2002; 296:2388-2391.
27. Holt SJ and Riddle DL. SAGE surveys *C. elegans* carbohydrate metabolism: evidence for an anaerobic shift in the long-lived dauer larva. *Mech Ageing Dev*. 2003; 124:779-800.
28. Duttaroy A, Paul A, Kundu M, and Belton A. A Sod2 null mutation confers severely reduced adult life span in *Drosophila*. *Genetics*. 2003; 165:2295-2299.

29. Li Y, Huang TT, Carlson EJ, Melov S, Ursell PC, Olson JL, Yoshimura MP, Berger C, Chan PH, et al. Dilated cardiomyopathy and neonatal lethality in mutant mice lacking manganese superoxide dismutase. *Nat Genet.* 1995; 11:376-381.
30. Van Raamsdonk JM and Hekimi S. Deletion of the mitochondrial superoxide dismutase sod-2 extends lifespan in *Caenorhabditis elegans*. *PLoS Genet.* 2009; 5:e1000361.
31. Doonan R, McElwee JJ, Matthijssens F, Walker GA, Houthoofd K, Back P, Matscheski A, Vanfleteren JR, and Gems D. Against the oxidative damage theory of aging: superoxide dismutases protect against oxidative stress but have little or no effect on life span in *Caenorhabditis elegans*. *Genes Dev.* 2008; 22:3236-3241.
32. Walker DW, Hajek P, Muffat J, Knoepfle D, Cornelison S, Attardi G, and Benzer S. Hypersensitivity to oxygen and shortened lifespan in a *Drosophila* mitochondrial complex II mutant. *Proc Natl Acad Sci U S A.* 2006; 103:16382-16387.
33. Dietzl G, Chen D, Schnorrer F, Su KC, Barinova Y, Fellner M, Gasser B, Kinsey K, Oettel S, Scheiblauer S, et al. A genome-wide transgenic RNAi library for conditional gene inactivation in *Drosophila*. *Nature.* 2007; 448:151-156.
34. Copeland JM, Cho J, Lo T. Jr, Hur JH, Bahadorani S, Arabyan T, Rabie J, Soh J, and Walker DW. Extension of *Drosophila* life span by RNAi of the mitochondrial respiratory chain. *Curr Biol.* 2009; 19:1591-1598.
35. Bahadorani S, Hur JH, Lo T, Vu K, and Walker DW. Perturbation of mitochondrial complex V alters the response to dietary restriction in *Drosophila*. *Aging Cell.* 2009; 9:100-103.
36. Zid BM, Rogers AN, Katewa SD, Vargas MA, Kolipinski MC, Lu TA, Benzer S, and Kapahi P. 4E-BP extends lifespan upon dietary restriction by enhancing mitochondrial activity in *Drosophila*. *Cell.* 2009; 139:149-160.
37. Wallace, DC. Mitochondrial diseases in man and mouse. *Science.* 1999; 283:1482-1488.
38. Piruat JI, Pintado CO, Ortega-Saenz P, Roche M, and Lopez-Barneo J. The mitochondrial SDHD gene is required for early embryogenesis, and its partial deficiency results in persistent carotid body glomus cell activation with full responsiveness to hypoxia. *Mol Cell Biol.* 2004; 24:10933-10940.
39. Kruse SE, Watt WC, Marcinek DJ, Kapur RP, Schenkman KA, and Palmiter RD. Mice with mitochondrial complex I deficiency develop a fatal encephalomyopathy. *Cell Metab.* 2008; 7:312-320.
40. Freyer C and Larsson NG. Is energy deficiency good in moderation? *Cell.* 2007; 131:448-450.
41. Pospisilik JA, Knauf C, Joza N, Benit P, Orthofer M, Cani PD, Ebersberger I, Nakashima T, Sarao R, Neely G, et al. Targeted deletion of AIF decreases mitochondrial oxidative phosphorylation and protects from obesity and diabetes. *Cell.* 2007; 131:476-491.
42. Lapointe J and Hekimi S. Early mitochondrial dysfunction in long-lived *Mclk1*<sup>+/-</sup> mice. *J Biol Chem.* 2008; 283:26217-26227.
43. Liu, X., Jiang N, Hughes B, Bigras E, Shoubridge E, and Hekimi S. Evolutionary conservation of the *clk-1*-dependent mechanism of longevity: loss of *mclk1* increases cellular fitness and lifespan in mice. *Genes Dev.* 2005; 19:2424-2434.
44. Dell'agnello C, Leo S, Agostino A, Szabadkai G, Tiveron C, Zulian A, Prella A, Roubertoux P, Rizzuto R, and Zeviani M. Increased longevity and refractoriness to  $Ca^{2+}$ -dependent neurodegeneration in *Surf1* knockout mice. *Hum Mol Genet.* 2007; 16:431-444.
45. Fukui H, Diaz F, Garcia S, and Moraes CT. Cytochrome c oxidase deficiency in neurons decreases both oxidative stress and amyloid formation in a mouse model of Alzheimer's disease. *Proc Natl Acad Sci U S A.* 2007; 104:14163-14168.
46. Barros MH, Bandy B, Tahara EB, and Kowaltowski AJ. Higher respiratory activity decreases mitochondrial reactive oxygen release and increases life span in *Saccharomyces cerevisiae*. *J Biol Chem.* 2004; 279:49883-49888.
47. Lin SJ, Kaerberlein M, Andalis AA, Sturtz LA, Defossez PA, Culotta VC, Fink GR, and Guarente, L. Calorie restriction extends *Saccharomyces cerevisiae* lifespan by increasing respiration. *Nature.* 2002; 418:344-348.
